# Supplementary material for: Fusion between cancer cells and macrophages occurs in a murine model of spontaneous neu+ breast cancer without increasing its metastatic potential
Source: PubMed Central journal article supplement (PMC5308617; doi:10.18632/oncotarget.11508), 2016-08-22
Supplement: oncotarget-07-60793-s001.pdf [file oncotarget-07-60793-s001.pdf]

# Fusion between cancer cells and macrophages occurs in a murine model of spontaneous *neu*<sup>+</sup> breast cancer without increasing its metastatic potential

## Supplementary Material

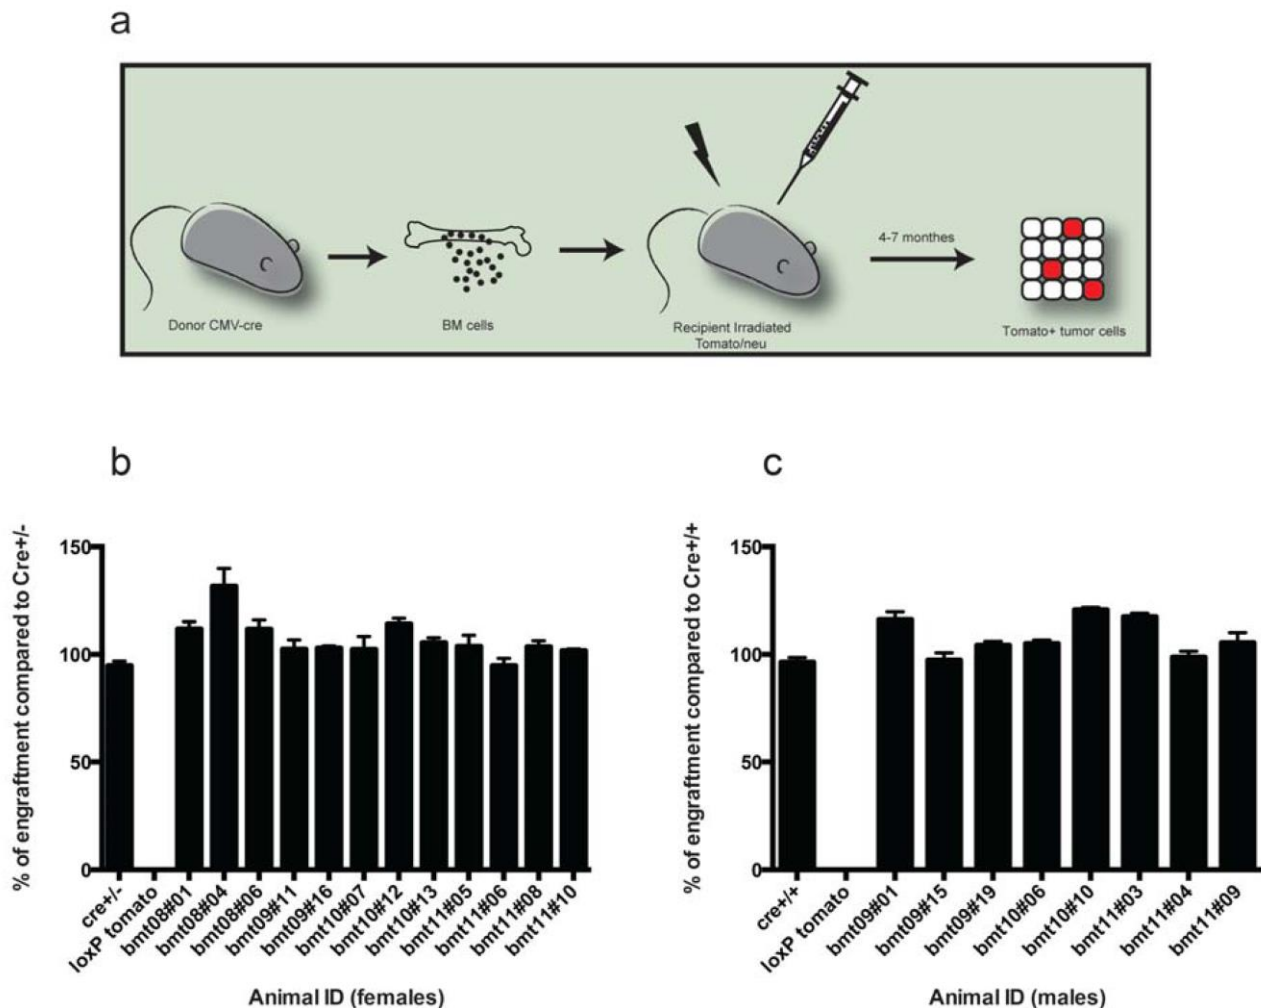

**Supplementary Fig. 1. Bone Marrow Transplant (BMT) chimeric model.** (a) Outline of the BMT chimeric model. Male or female Tomato/*neu* animals were lethally irradiated and subjected to BMT from female CRE<sup>+/+</sup> or male CRE<sup>+/-</sup> animals, respectively. Fusion between tumor cells and hematopoietic-derived cells would induce expression of Tomato fluorescent protein. (b and c) Chimerism assessment in the BMT model by qPCR. All the transplanted animals showed high levels of bone marrow chimerism ranging from 95% to 100% as revealed by qPCR on peripheral

blood derived genomic DNA. **(b)** Percentage of engraftment in female Tomato/neu animals transplanted with bone marrow from male  $CRE^{+/-}$  animals. **(c)** Percentage of engraftment in male Tomato/neu animals transplanted with bone marrow from female  $CRE^{+/+}$  animals (the *CRE* transgene is located on the X chromosome).
